# Supplementary material for: Eukaryotic initiation factor 5B (eIF5B) provides a critical cell survival switch to glioblastoma cells via regulation of apoptosis
Source: PubMed Central journal article supplement (PMC6342974; doi:10.1038/s41419-018-1283-5), 2019-01-22
Supplement: 41419_2018_1283_MOESM1_ESM.pdf [file 41419_2018_1283_MOESM1_ESM.pdf]

## **Supplemental Materials and Methods**

### **Fractionation of mitochondrial versus cytosolic proteins**

U343 cells were seeded at 1.5 million cells per plate and reverse transfected in two 10-cm Petri plates per condition. After 96 hours, the control or eIF5B-depleted cells were pooled, lysed in 1.5 mL of mitochondrial isolation buffer (250 mM sucrose, 10 mM HEPES, 1 mM EGTA, 0.5 mM PMSF, pH 7.4) by Dounce homogenization, and fractionated by differential centrifugation as previously described<sup>1</sup>. The mitochondrial pellets were resuspended in 50  $\mu$ L of RIPA lysis buffer supplemented with protease inhibitors. Western blotting was performed as described in the main text.

**Table S1. Genetic markers in glioblastoma lines used in this study.**

| Cell line | p53               | PTEN              | MGMT              | DR4/5             | EGFR                     |
|-----------|-------------------|-------------------|-------------------|-------------------|--------------------------|
| U343      | WT <sup>2</sup>   | Mut <sup>3</sup>  | Neg <sup>4</sup>  | Pos <sup>5</sup>  | WT <sup>3</sup>          |
| U251N     | Mut <sup>2</sup>  | Mut <sup>6</sup>  | Neg <sup>7</sup>  | Pos <sup>8</sup>  | WT <sup>9</sup>          |
| A172      | WT <sup>10</sup>  | Mut <sup>11</sup> | Neg <sup>12</sup> | Pos <sup>13</sup> | Active mut <sup>14</sup> |
| U87MG     | WT <sup>2</sup>   | Mut <sup>3</sup>  | Pos <sup>4</sup>  | Pos <sup>8</sup>  | WT <sup>15</sup>         |
| U373      | Mut <sup>16</sup> | Mut <sup>3</sup>  | Neg <sup>7</sup>  | Pos <sup>17</sup> | WT <sup>3</sup>          |

**Table S2. qPCR Primers and antibodies used in this study.**

| Target                | Primer                                    | Sequence (5' to 3')                                 | Annealing Temp (°C) | Reference or source |
|-----------------------|-------------------------------------------|-----------------------------------------------------|---------------------|---------------------|
| XIAP                  | -                                         | QuantiTect primer assay, QT00042854                 | 55                  | Qiagen              |
| Bcl-xL                | -                                         | QuantiTect primer assay, QT00236712                 | 55                  |                     |
| Nrf2                  | -                                         | QuantiTect primer assay, QT00027384                 | 55                  |                     |
| p21                   | -                                         | QuantiTect primer assay, QT00062090                 | 55                  |                     |
| cIAP1                 | Fw<br>Rv                                  | TCTGGAGATGATCCATGGGTAGA<br>TGGCCTTTCATTCGTATCAAGA   | 51                  | 18                  |
| c-FLIP <sub>S</sub>   | Fw<br>Rv-S                                | GATGTTGCTATAGATGTGGTTC<br>ATTTCCAAGAATTTTCAGATCAGGA | 47                  | 19                  |
| c-FLIP <sub>L</sub>   | Rv-L                                      | CCTGAATGGATTTCTTCACTGG                              | 48                  |                     |
| β-actin               | Fw<br>Rv                                  | TCACCCACACTGTGCCCATCTACGA<br>TGAGGTAGTCAGTCAGGTCCC  | 55                  | 20                  |
| Company               | Antibody Target                           |                                                     | Catalogue number    |                     |
| Abcam                 | Secondary: Goat anti-rabbit-HRP conjugate |                                                     | ab97051             |                     |
| ProteinTech           | eIF5B                                     |                                                     | 13527-1-AP          |                     |
| Bio-Rad               | β-actin (hFAB Rhodamine)                  |                                                     | 12004163            |                     |
| Abcam                 | cIAP1                                     |                                                     | ab108361            |                     |
|                       | cIAP2                                     |                                                     | ab137393            |                     |
|                       | eIF1A                                     |                                                     | ab177939            |                     |
|                       | Mdm2                                      |                                                     | ab178938            |                     |
|                       | Nrf2                                      |                                                     | ab71890             |                     |
|                       | tBid                                      |                                                     | ab10640             |                     |
| SantaCruz Biotech.    | p27                                       |                                                     | SC-521              |                     |
| Calbiochem            | p53 (C-terminus)                          |                                                     | pAB421              |                     |
| Thermo Fisher         | Phospho PERK                              |                                                     | PA5-40294           |                     |
| Cell Signalling Tech. | Akt                                       |                                                     | 9272                |                     |
|                       | Phospho Akt                               |                                                     | 9271                |                     |
|                       | Bak                                       |                                                     | 12105               |                     |
|                       | Bax                                       |                                                     | 2772                |                     |
|                       | Bcl-xL                                    |                                                     | 2762                |                     |
|                       | Bid                                       |                                                     | 2002                |                     |
|                       | Bim                                       |                                                     | 2933                |                     |

|                |       |
|----------------|-------|
| Cas-3          | 9662  |
| Cas-7          | 9492  |
| Cas-8          | 9746  |
| Cas-9          | 9502  |
| COX IV         | 4844  |
| Cytochrome c   | 11940 |
| DR4            | 42533 |
| DR5            | 3696  |
| EGFR           | 2232  |
| Phospho EGFR   | 3777  |
| FADD           | 2782  |
| Phospho FADD   | 2781  |
| c-FLIP         | 56343 |
| JNK            | 9252  |
| Phospho JNK    | 9251  |
| Livin          | 5471  |
| PARP (total)   | 9542  |
| PARP (cleaved) | 9541  |
| p21            | 2947  |
| p53 (total)    | 2527  |
| PERK           | 3192  |
| p65            | 4764  |
| Phospho p65    | 3033  |
| Survivin       | 2808  |
| S6             | 2317  |
| Phospho S6     | 5364  |
| XIAP           | 2045  |

## Supplemental References

1. Jin Hyun Jun JK, Kyung Tae Kim and Ho Joong Sung. Application of an Efficient Method for Isolation of Mitochondria from Biological Samples. *Biomedical Science Letters* 2014, **20**(3): 180-184.
2. Asai A, Miyagi Y, Sugiyama A, Gamanuma M, Hong SH, Takamoto S, *et al.* Negative effects of wild-type p53 and s-Myc on cellular growth and tumorigenicity of glioma cells. Implication of the tumor suppressor genes for gene therapy. *Journal of neuro-oncology* 1994, **19**(3): 259-268.
3. Sauvageot CM, Weatherbee JL, Kesari S, Winters SE, Barnes J, Dellagatta J, *et al.* Efficacy of the HSP90 inhibitor 17-AAG in human glioma cell lines and tumorigenic glioma stem cells. *Neuro-oncology* 2009, **11**(2): 109-121.
4. Voss V, Senft C, Lang V, Ronellenfitsch MW, Steinbach JP, Seifert V, *et al.* The pan-Bcl-2 inhibitor (-)-gossypol triggers autophagic cell death in malignant glioma. *Molecular cancer research : MCR* 2010, **8**(7): 1002-1016.
5. Cheung HH, Mahoney DJ, Lacasse EC, Korneluk RG. Down-regulation of c-FLIP Enhances death of cancer cells by smac mimetic compound. *Cancer Res* 2009, **69**(19): 7729-7738.
6. Ren Y, Zhou X, Mei M, Yuan XB, Han L, Wang GX, *et al.* MicroRNA-21 inhibitor sensitizes human glioblastoma cells U251 (PTEN-mutant) and LN229 (PTEN-wild type) to taxol. *BMC cancer* 2010, **10**: 27.
7. Chahal M, Abdulkarim B, Xu Y, Guiot MC, Easaw JC, Stifani N, *et al.* O6-Methylguanine-DNA methyltransferase is a novel negative effector of invasion in glioblastoma multiforme. *Molecular cancer therapeutics* 2012, **11**(11): 2440-2450.
8. Kang YJ, Kim IY, Kim EH, Yoon MJ, Kim SU, Kwon TK, *et al.* Paxilline enhances TRAIL-mediated apoptosis of glioma cells via modulation of c-FLIP, survivin and DR5. *Experimental & molecular medicine* 2011, **43**(1): 24-34.
9. Torsvik A, Stieber D, Enger PO, Golebiewska A, Molven A, Svendsen A, *et al.* U-251 revisited: genetic drift and phenotypic consequences of long-term cultures of glioblastoma cells. *Cancer medicine* 2014, **3**(4): 812-824.
10. Mittelbronn M, Platten M, Zeiner P, Dombrowski Y, Frank B, Zachskorn C, *et al.* Macrophage migration inhibitory factor (MIF) expression in human malignant gliomas contributes to immune escape and tumour progression. *Acta neuropathologica* 2011, **122**(3): 353-365.
11. Zhang R, Banik NL, Ray SK. Differential sensitivity of human glioblastoma LN18 (PTEN-positive) and A172 (PTEN-negative) cells to Taxol for apoptosis. *Brain research* 2008, **1239**: 216-225.
12. Gaspar N, Marshall L, Perryman L, Bax DA, Little SE, Viana-Pereira M, *et al.* MGMT-independent temozolomide resistance in pediatric glioblastoma cells associated with a PI3-kinase-mediated HOX/stem cell gene signature. *Cancer research* 2010, **70**(22): 9243-9252.

13. van Roosmalen IAM, Reis CR, Setroikromo R, Yuvaraj S, Joseph JV, Tepper PG, *et al.* The ER stress inducer DMC enhances TRAIL-induced apoptosis in glioblastoma. *SpringerPlus* 2014, **3**: 495.
14. Fenstermaker RA, Ciesielski MJ. EGFR Intron Recombination in Human Gliomas: Inappropriate Diversion of V(D)J Recombination? *Current genomics* 2007, **8**(3): 163-170.
15. Fontana AO, Piffaretti D, Marchi F, Burgio F, Faia-Torres AB, Paganetti P, *et al.* Epithelial growth factor receptor expression influences 5-ALA induced glioblastoma fluorescence. *Journal of neuro-oncology* 2017, **133**(3): 497-507.
16. Gomez-Manzano C, Fueyo J, Kyritsis AP, McDonnell TJ, Steck PA, Levin VA, *et al.* Characterization of p53 and p21 functional interactions in glioma cells en route to apoptosis. *Journal of the National Cancer Institute* 1997, **89**(14): 1036-1044.
17. Hetschko H, Voss V, Horn S, Seifert V, Prehn JH, Kogel D. Pharmacological inhibition of Bcl-2 family members reactivates TRAIL-induced apoptosis in malignant glioma. *Journal of neuro-oncology* 2008, **86**(3): 265-272.
18. Graber TE, Baird SD, Kao PN, Mathews MB, Holcik M. NF45 functions as an IRES trans-acting factor that is required for translation of cIAP1 during the unfolded protein response. *Cell Death Differ* 2010, **17**(4): 719-729.
19. Ueffing N, Singh KK, Christians A, Thorns C, Feller AC, Nagl F, *et al.* A single nucleotide polymorphism determines protein isoform production of the human c-FLIP protein. *Blood* 2009, **114**(3): 572-579.
20. Khan D, Katoch A, Das A, Sharathchandra A, Lal R, Roy P, *et al.* Reversible induction of translational isoforms of p53 in glucose deprivation. *Cell death and differentiation* 2015, **22**(7): 1203-1218.

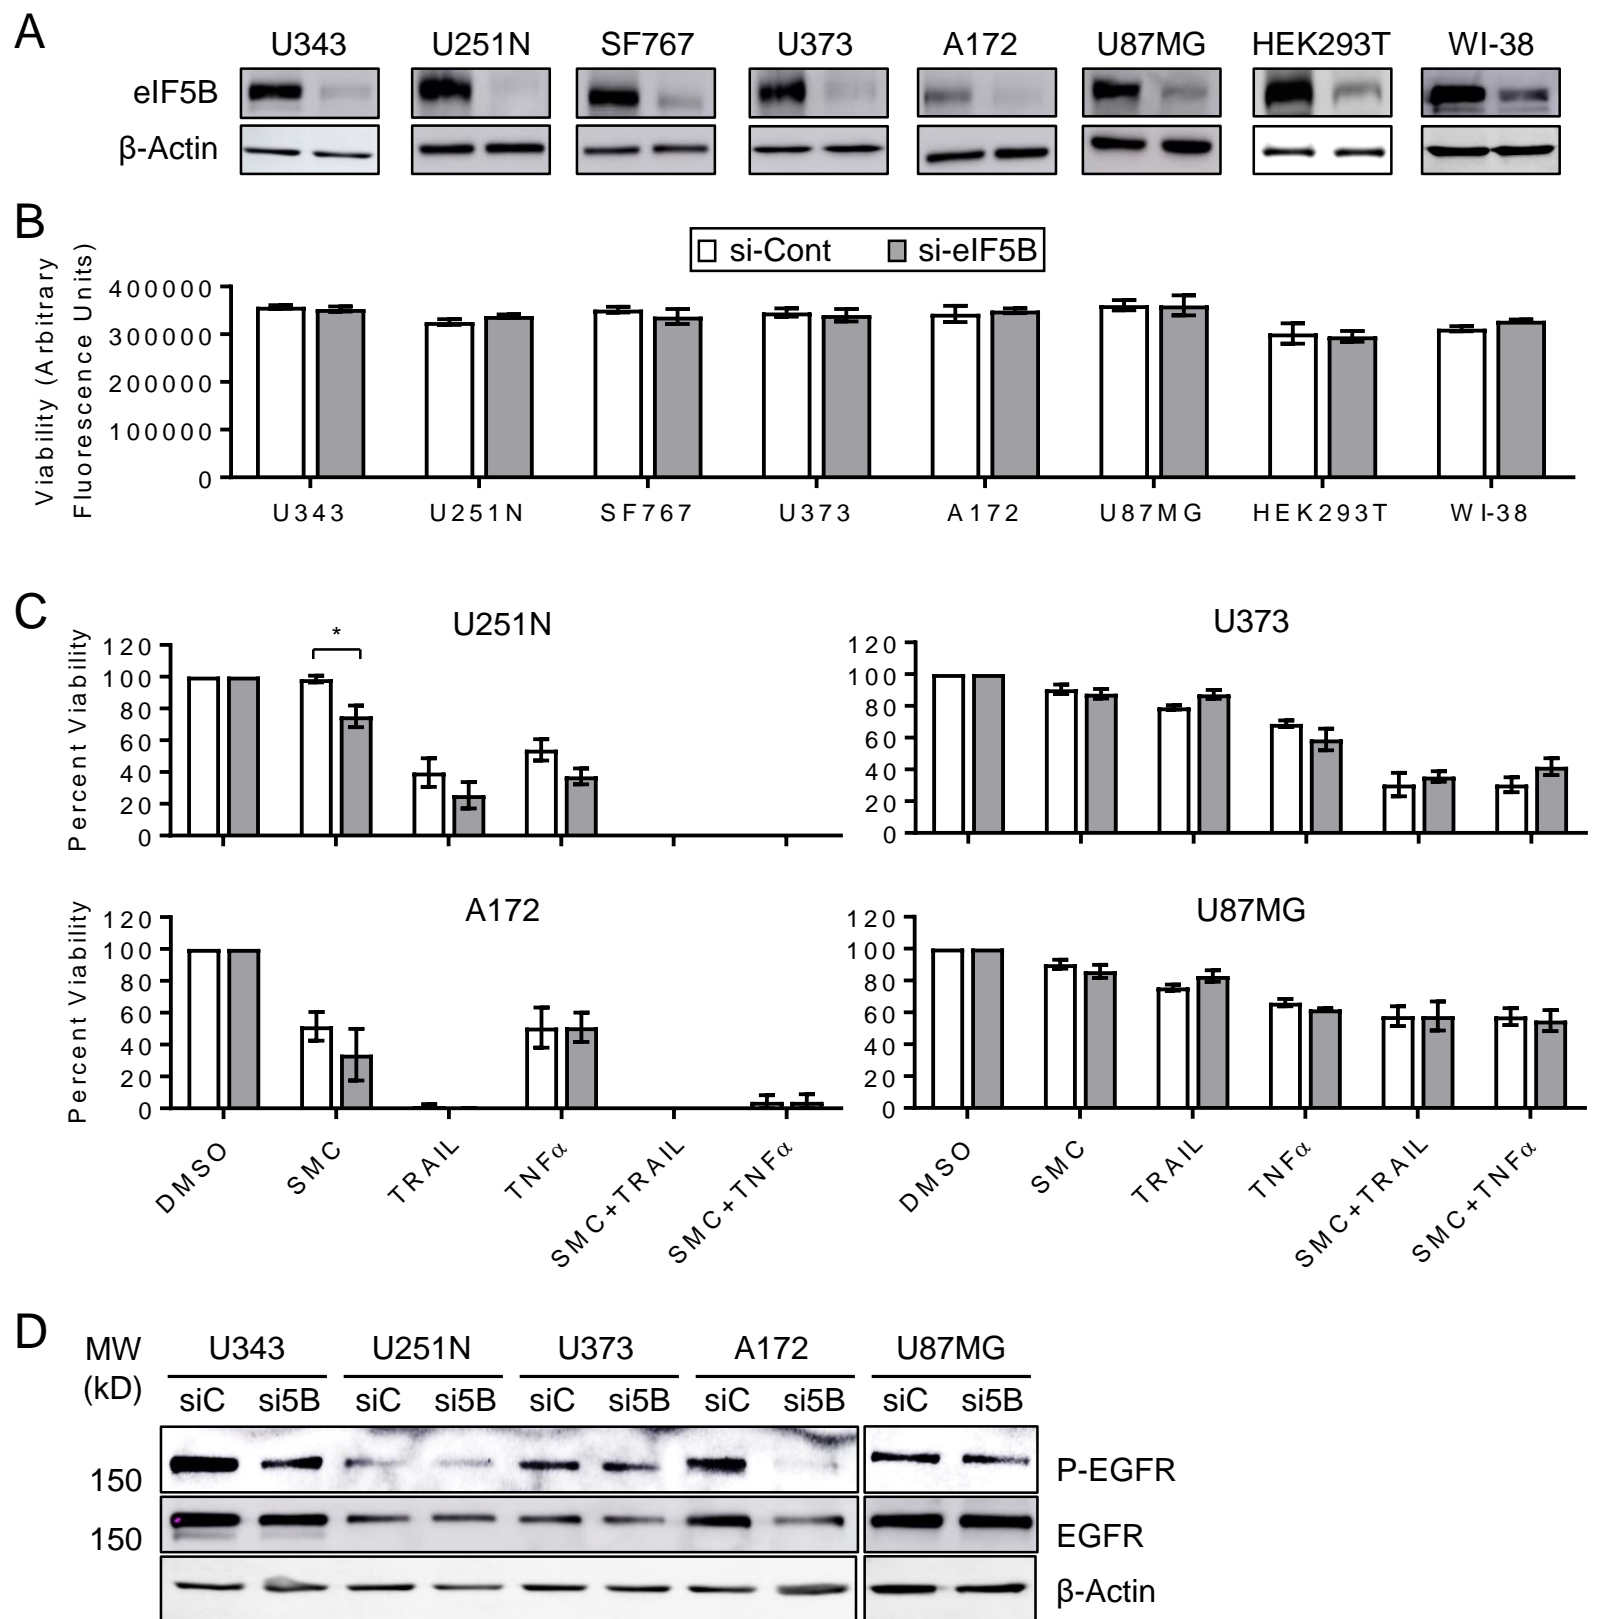

**Figure S1. Effects of eIF5B depletion on various cell lines.**

**(A)** Immunoblots confirming eIF5B silencing in various cell lines. **(B)** Depletion of eIF5B has little effect on alamarBlue activity in the tested cell lines. **(C)** Various cell lines were treated as in Figure 1. Data are expressed as mean  $\pm$  SEM for three independent biological replicates. \*,  $p < 0.05$ . **(D)** Effects of eIF5B depletion on total or phospho-EGFR (Tyr1068) in various cell lines.

A

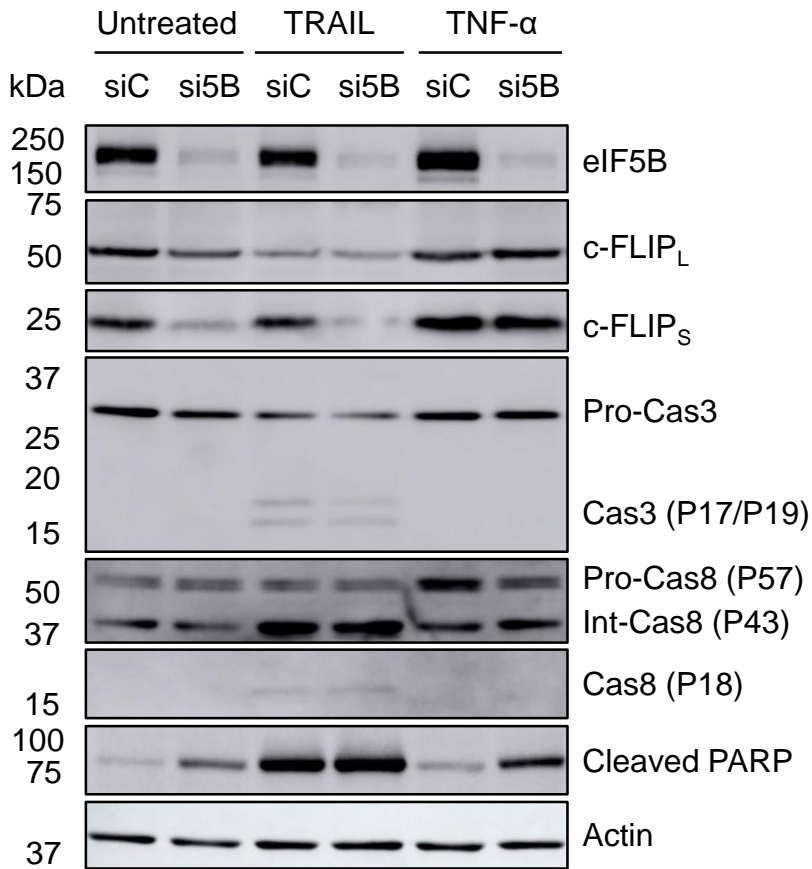

B

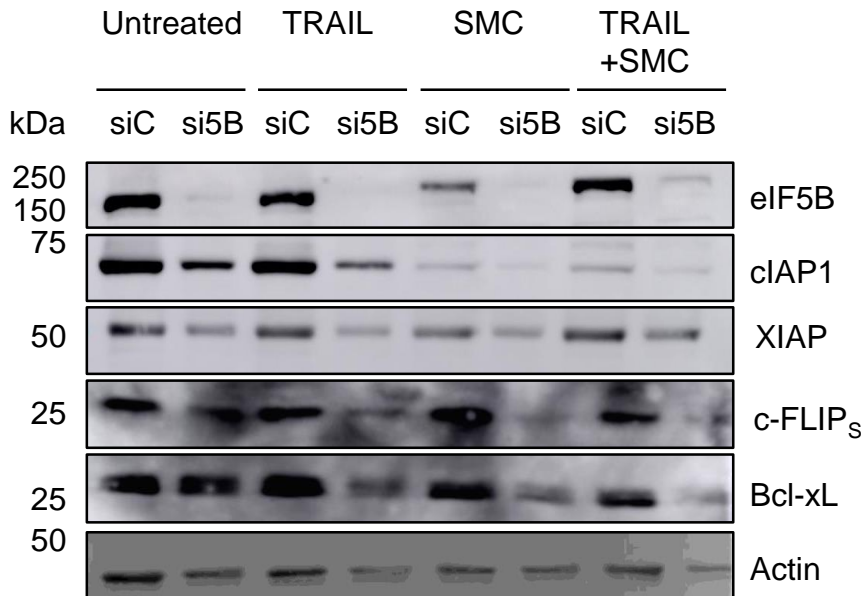

**Figure S2. Effects of eIF5B depletion on the levels of anti-apoptotic proteins and caspase activation in TNF- $\alpha$ - and SMC-treated U343 cells.**

**(A)** TNF- $\alpha$  prevents down-regulation of c-FLIP<sub>L</sub> levels upon eIF5B depletion and enhances c-FLIP<sub>S</sub> levels. Unlike TRAIL, TNF- $\alpha$  causes no activation of caspase-8 or -3 and no further cleavage of PARP than does eIF5B depletion alone. Lanes 1-4 for eIF5B, Cas-3, cFLIP<sub>L</sub>, and cFLIP<sub>S</sub> are also shown in Figures 4B and 5A, respectively. Here we have shown the exact same lanes to compare them with TNF $\alpha$  lanes. **(B)** SMC decreases levels of cIAP1 but not XIAP, c-FLIP<sub>S</sub> or Bcl-xL. Depletion of eIF5B causes a decrease in cIAP1, XIAP, c-FLIP<sub>S</sub>, and Bcl-xL in the presence of TRAIL, SMC, or TRAIL+SMC.

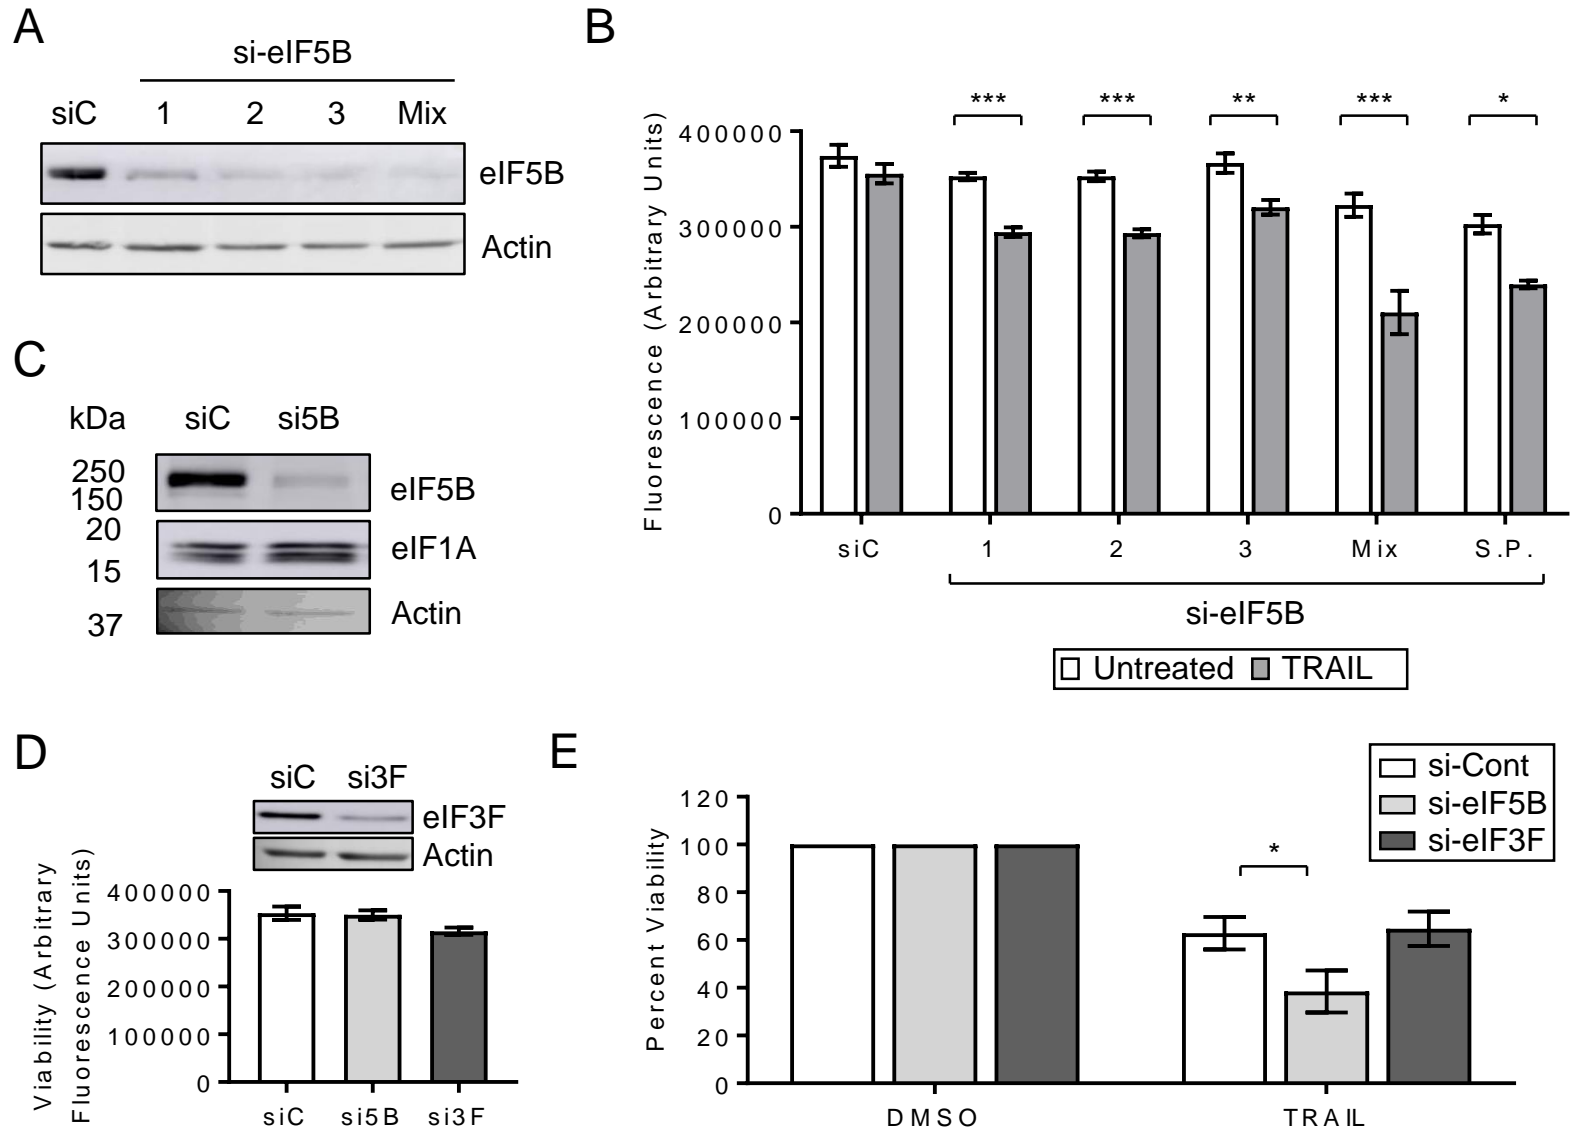

**Figure S3. Controls related to Figure 1.**

**(A)** Immunoblot confirming eIF5B silencing by the individual siRNAs or the mix of three siRNAs used throughout this study, relative to the non-specific control siRNA (siC). **(B)** Each siRNA, as well as the mix and a SMARTpool from Dharmacon (S.P.), yields increased sensitivity of U434 cells to TRAIL. **(C)** Immunoblot showing no obvious effect of eIF5B-depletion on eIF1A levels. **(D)** Like eIF5B, depletion of eIF3F alone has no significant effect on the viability of U434 cells. **(E)** Unlike eIF5B, silencing of eIF3F does not sensitize U434 cells to TRAIL. Data are expressed as mean  $\pm$  SEM for 3 independent biological replicates. \*,  $p < 0.05$ ; \*\*,  $p < 0.01$ ; \*\*\*,  $p < 0.001$ .



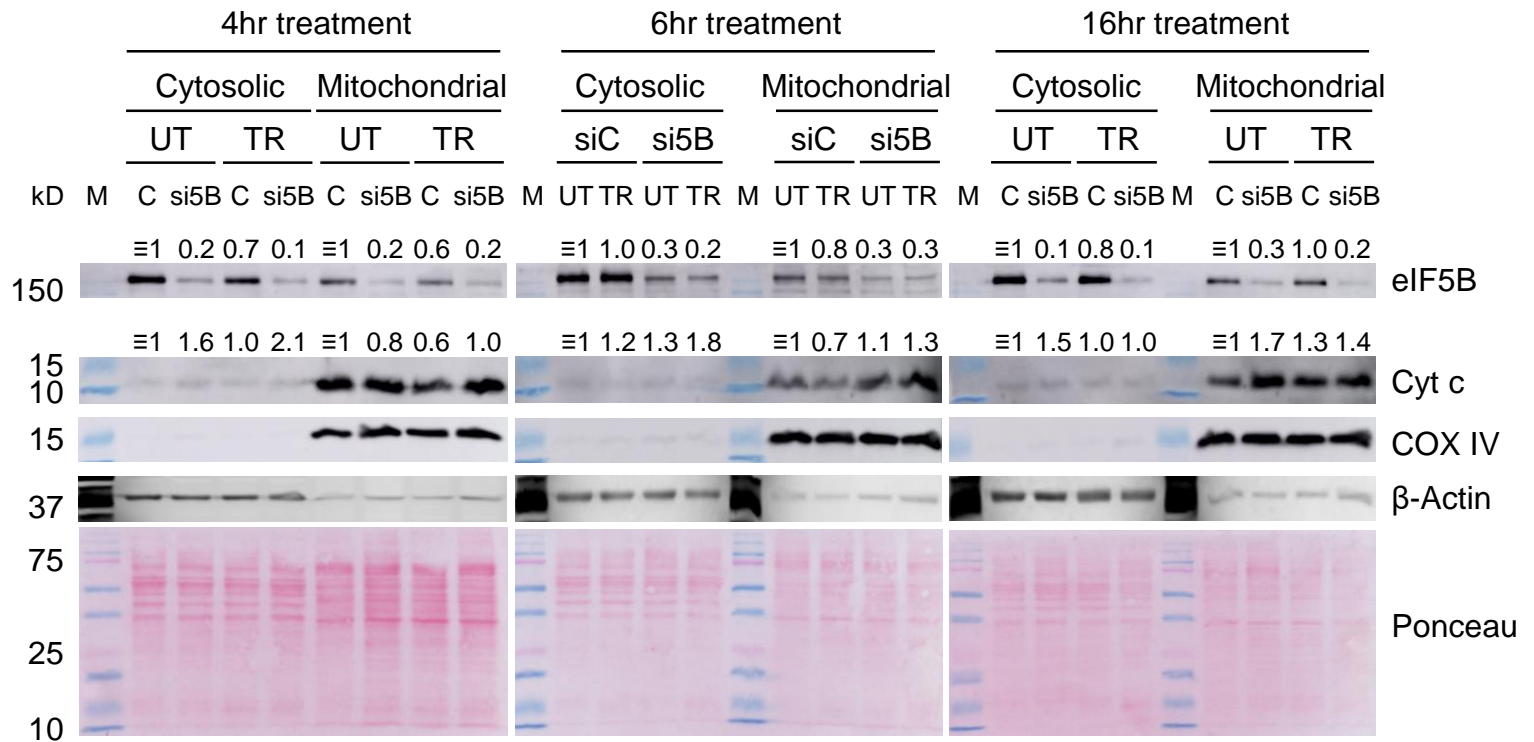

**Figure S4. Immunoblots of cytosolic versus mitochondrial proteins in control versus eIF5B-depleted U343 cells.**

Control or eIF5B-depleted U343 cells were harvested after a total of 96 hours of incubation; TRAIL was added to 100 ng/mL for the last 4, 6, or 16 hours of incubation, as indicated. Immunoblotting was performed for eIF5B, cytochrome c (Cyt c),  $\beta$ -actin (internal standard for cytosolic fractions), or cytochrome oxidase (COX IV; internal standard for mitochondrial fractions). A representative image is shown for a total protein stain of the membranes (Ponceau). The numbers above the blots represent a quantitation of eIF5B or cytochrome c, normalized to  $\beta$ -actin (in the case of the cytosolic fractions) or COX IV (in the case of the mitochondrial fractions).

A

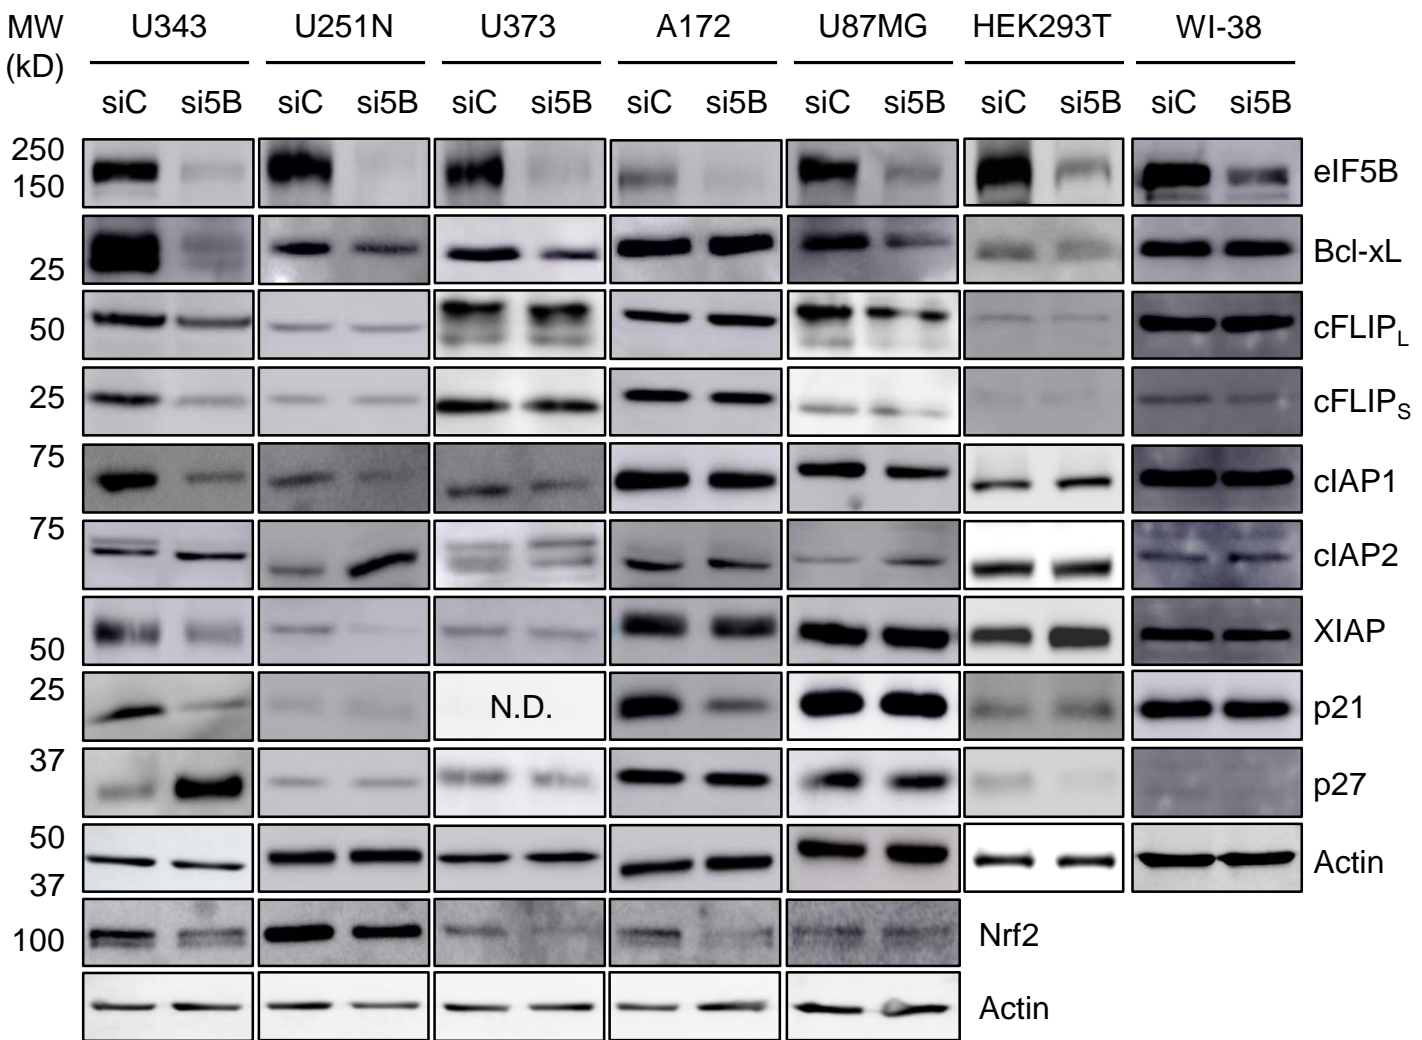

B

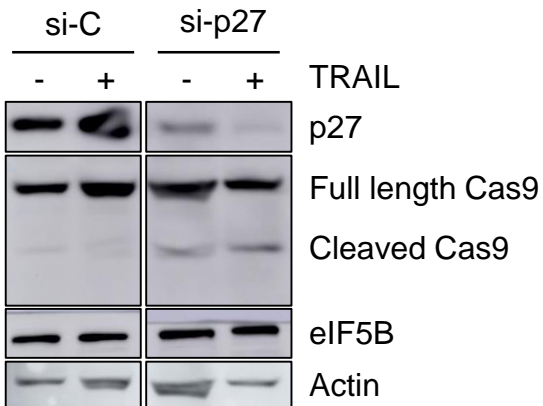

### Figure S5. Effects of eIF5B on pro-survival proteins.

(A) Effects of eIF5B depletion on anti-apoptotic proteins, p21, p27, and Nrf2 in various cell lines.

N.D., not detected. (B) Depletion of p27 leads to increased caspase-9 activation in U343 cells.

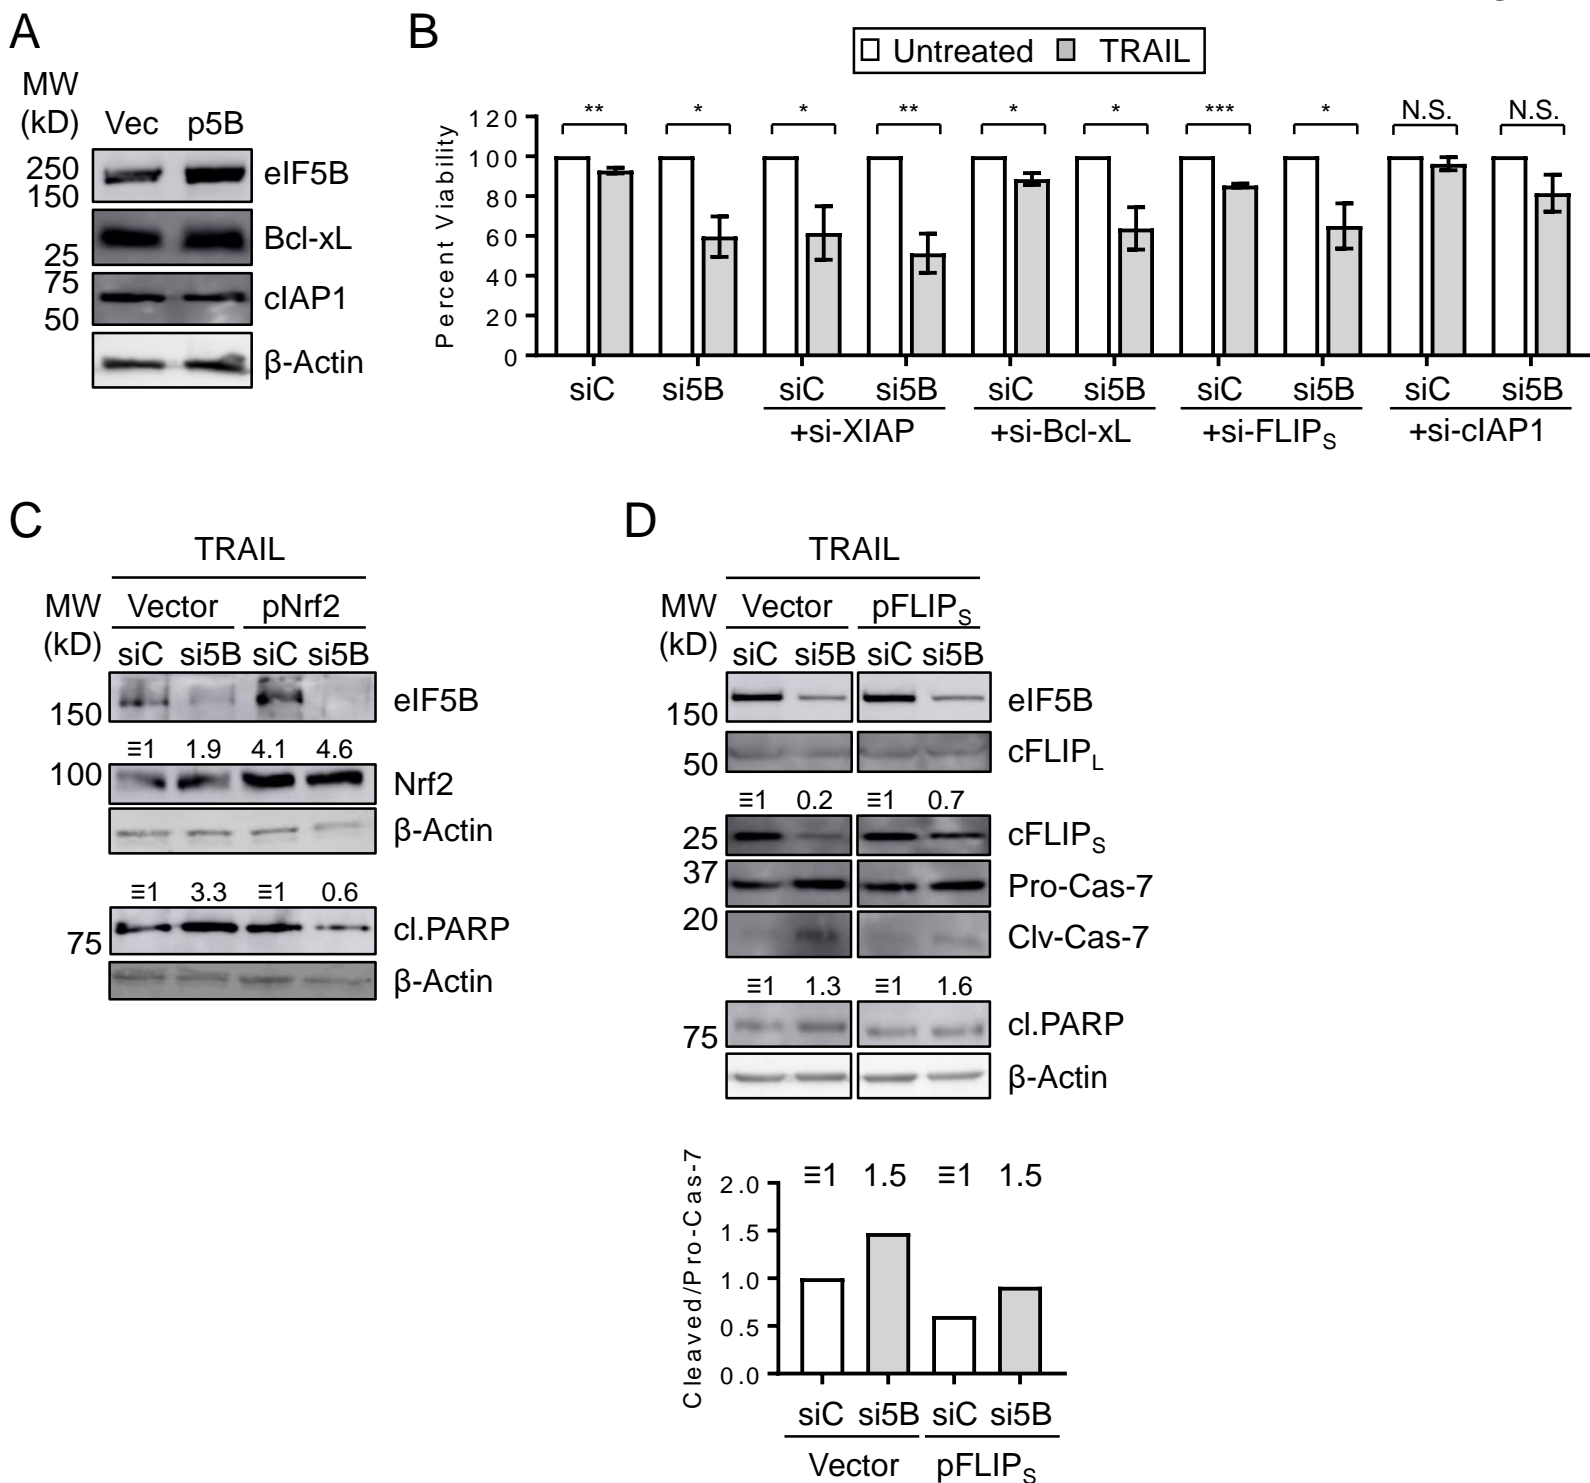

**Figure S6: The effect of eIF5B depletion on TRAIL sensitivity is exerted via several IAPs and Nrf2. (A)** Modest over-expression of eIF5B from a plasmid (p5B), obtained from Dharmacon (OHS6085-213579952), had little effect on Bcl-xL or cIAP1 levels. **(B)** The effect of eIF5B depletion on TRAIL sensitivity is epistatic with depletion of XIAP, Bcl-xL, and c-FLIP<sub>S</sub>. U434 cells were treated essentially as in Figure 1, except that eIF5B was depleted either alone or in combination with XIAP, Bcl-xL, c-FLIP<sub>S</sub> or cIAP1. Data are expressed as mean  $\pm$  SEM for 3 independent biological replicates. \*,  $p < 0.05$ ; \*\*,  $p < 0.01$ ; \*\*\*,  $p < 0.001$ . **(C)** Depletion of eIF5B causes increased PARP cleavage, which is reversed by expression of Nrf2 from a plasmid (pNrf2), obtained from AddGene (NC16 pCDNA3.1 FLAG NRF2). **(D)** Depletion of eIF5B causes increased cas-7 activation and PARP cleavage, neither of which is reversed by expression of c-FLIP<sub>S</sub> from a plasmid (pFLIP<sub>S</sub>), a gift of Christian Schwerk. For eIF5B depletion coupled with Nrf2 or c-FLIP<sub>S</sub> overexpression, 420,000 U434 cells were seeded per well in a 6-well plate and reverse transfected with control or eIF5B-specific siRNAs. After 48 hours of incubation, the cells were transfected with the indicated plasmid. After a further 42 hours of incubation, the cells were treated with 100 ng/mL TRAIL for 4 hours before being harvested for western blotting.

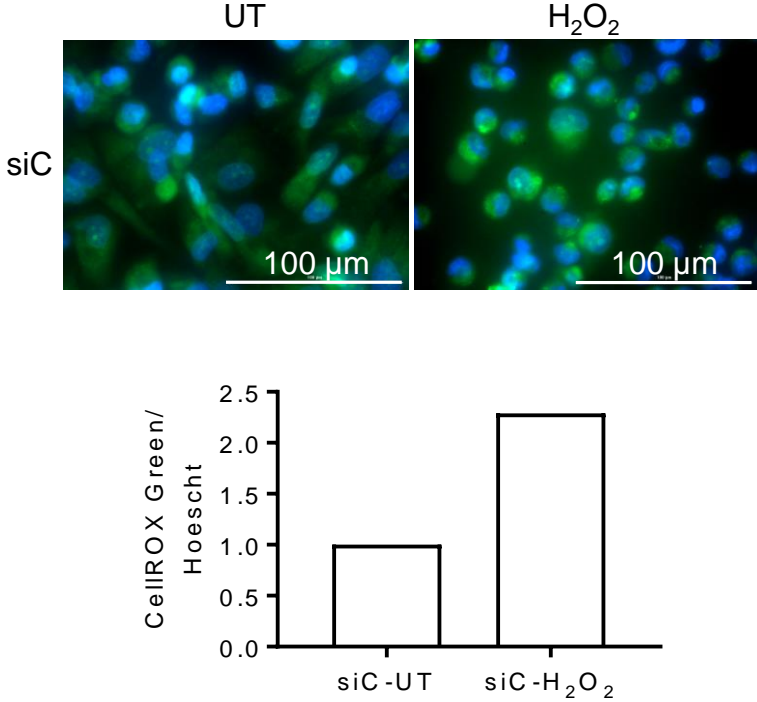

**Figure S7. CellROX green staining of untreated and H<sub>2</sub>O<sub>2</sub>-treated U343 cells (related to Figure 6E).** U43 cells were treated with siC as in Figure 6A. Instead of TRAIL, cells were treated for 4 hours with 200 μM H<sub>2</sub>O<sub>2</sub> or left untreated, before staining with CellROX green and processing as in Figure 6A.

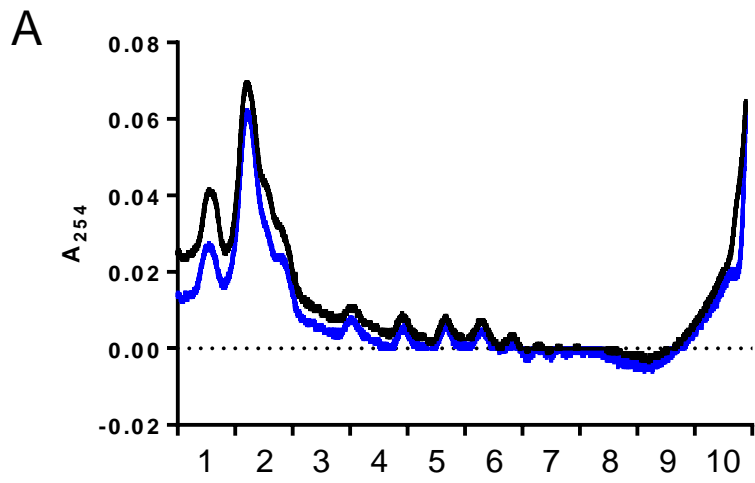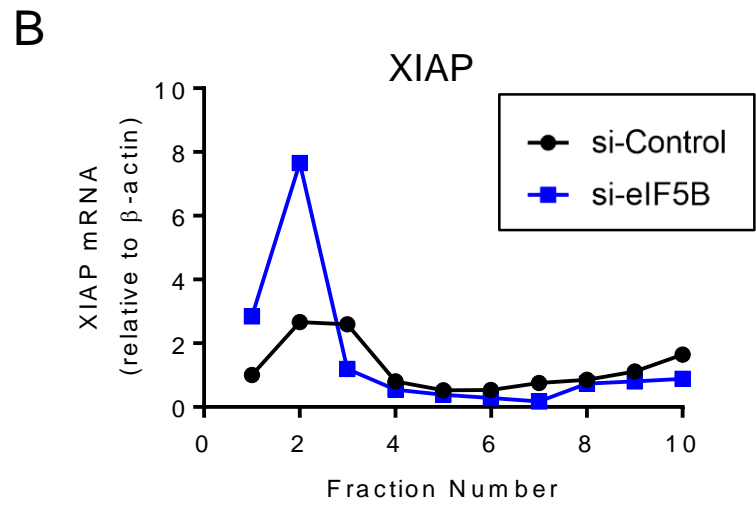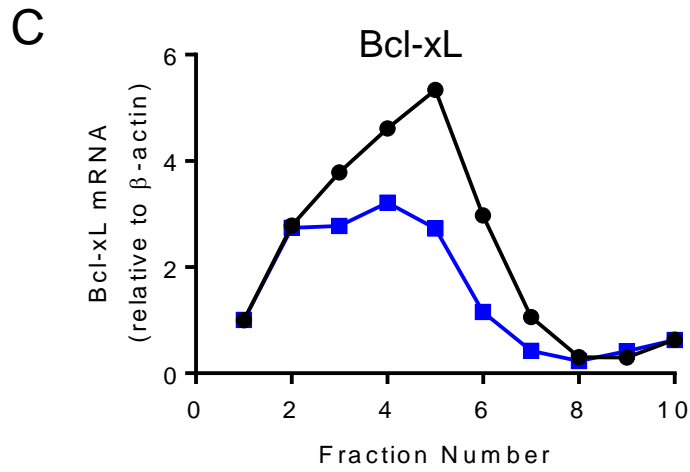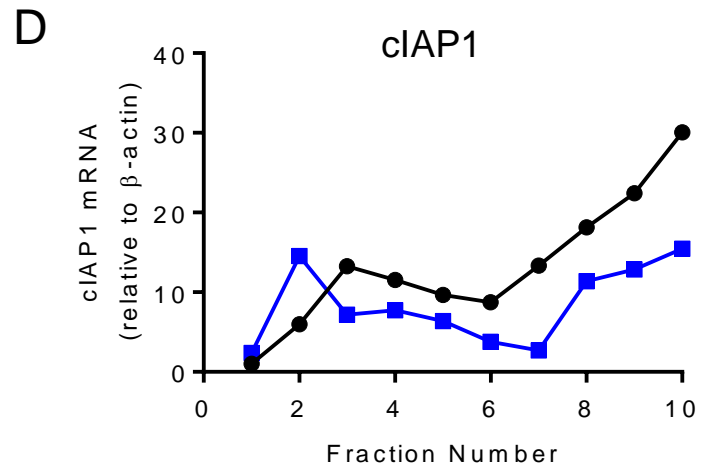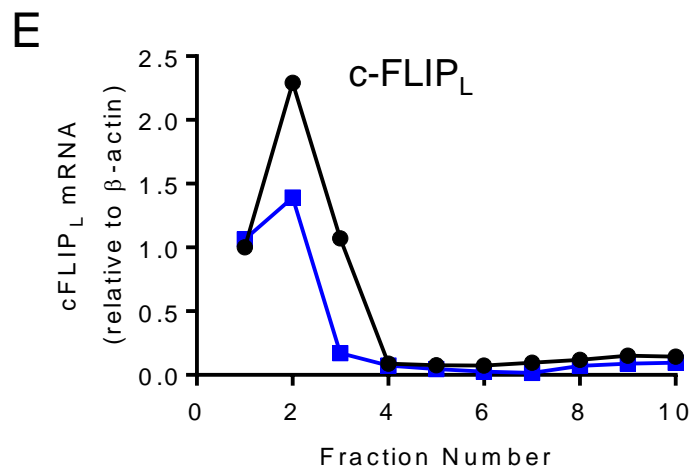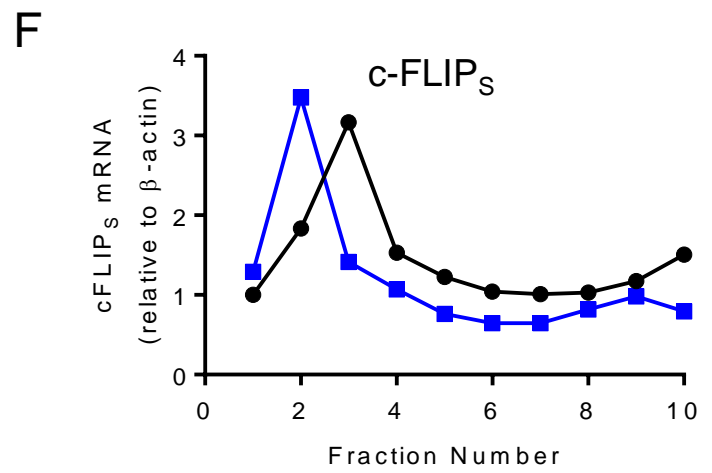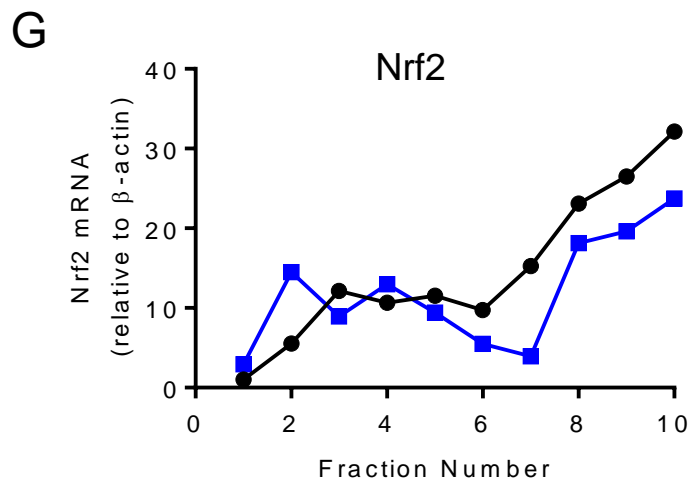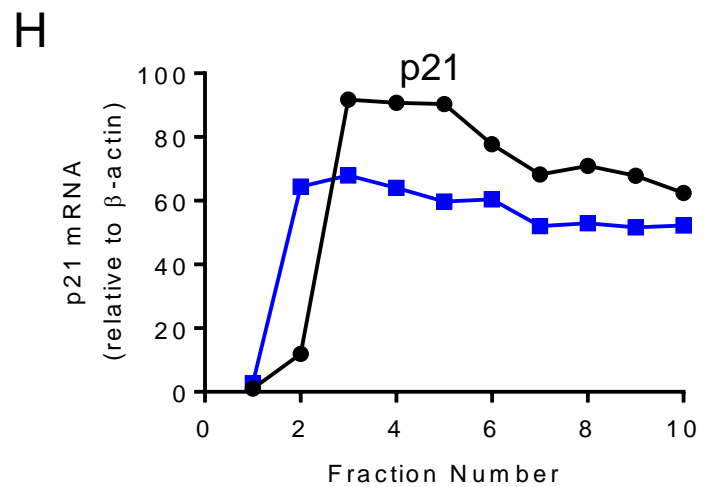

**Figure S8. Representative polysome profiles for control or eIF5B-depleted U343 cells (related to Figure 7).**

**(A)** Representative polysome profiles for control and eIF5B-depleted U343 cells (black and blue curves, respectively). **(B-H)** RNA was purified from the sucrose fractions indicated in panel (A) and subjected to RT-qPCR analysis. The proportion of mRNAs encoding XIAP **(B)**, Bcl-xL **(C)**, cIAP1 **(D)**, c-FLIP<sub>L</sub> **(E)**, c-FLIP<sub>S</sub> **(F)**, Nrf2 **(G)** and p21 **(H)**, all relative to  $\beta$ -actin mRNA, were quantified for each fraction.
